# Supplementary material for: LINC00844 promotes proliferation and migration of hepatocellular carcinoma by regulating NDRG1 expression
Source: PeerJ. 2020 Jan 28;8:e8394. doi: 10.7717/peerj.8394 (PMC6993750; doi:10.7717/peerj.8394)
Supplement: File S1 [file peerj-08-8394-s003.xls]

## Sheet: Sheet1
TCGA-BC-A10Y-11A	TCGA-DD-A3A5-11A	TCGA-BC-A10W-11A	TCGA-FV-A2QR-11A	TCGA-BC-A10U-11A	TCGA-BC-A10R-11A	TCGA-DD-A39Z-11A	TCGA-DD-A1EB-11A	TCGA-DD-A1EC-11A	TCGA-DD-A3A4-11A
Solid Tissue Normal	Solid Tissue Normal	Solid Tissue Normal	Solid Tissue Normal	Solid Tissue Normal	Solid Tissue Normal	Solid Tissue Normal	Solid Tissue Normal	Solid Tissue Normal	Solid Tissue Normal
-3.04489	-5.91957	0.321026	-0.457112	-1.76194	-2.36538	0.379732	-2.95538	-2.66822	0.520878
0.771798	-0.191648	-0.753742	1.07262	-0.859238	-0.386757	1.00203	-0.0559108	1.16272	0.340306
-1.14677	-2.46014	-1.55344	-1.65266	-0.504143	-1.49865	-2.18911	-2.01197	-2.46177	-1.00859
-1.37504	-2.01268	-0.635905	-1.24931	-1.42752	-2.54596	-1.45214	-2.13226	-3.56131	-1.24466
-1.64635	-1.39601	-0.816478	-0.676121	-3.47815	-2.99342	-0.966718	-1.61143	-1.8451	0.629813
4.57048	6.05664	5.11005	5.38856	5.32967	5.77146	6.39209	5.65451	5.5113	5.23467
4.24973	5.03826	5.02538	2.80041	5.14338	5.23409	4.03971	4.25032	3.5216	3.45948
7.4465	7.28026	6.32125	6.17675	6.45238	6.92043	6.72198	7.01029	7.06427	5.98992
4.02998	4.54293	4.34899	3.11253	3.38515	2.51005	4.82807	3.55241	3.61005	2.4899
4.86799	5.35597	4.14185	2.85462	3.58332	4.34238	4.78128	4.66328	4.19072	3.15982
