# Supplementary material for: LINC00844 promotes proliferation and migration of hepatocellular carcinoma by regulating NDRG1 expression
Source: PeerJ. 2020 Jan 28;8:e8394. doi: 10.7717/peerj.8394 (PMC6993750; doi:10.7717/peerj.8394)
Supplement: File S2 [file peerj-08-8394-s004.xls]

## Sheet: Sheet1
Expression of LINC00844	Sample Type	Value(0 or 1)
4.20892	Primary Tumor	1
-3.77598	Primary Tumor	1
0.140522	Primary Tumor	1
1.88911	Primary Tumor	1
3.08495	Primary Tumor	1
-7.11994	Primary Tumor	1
-7.24582	Primary Tumor	1
-6.16615	Primary Tumor	1
1.17007	Primary Tumor	1
1.026	Primary Tumor	1
1.74112	Primary Tumor	1
4.95694	Primary Tumor	1
6.17126	Primary Tumor	1
5.96433	Primary Tumor	1
-5.04545	Primary Tumor	1
0.464742	Primary Tumor	1
-1.65804	Primary Tumor	1
-1.89034	Primary Tumor	1
-3.92572	Primary Tumor	1
6.84023	Primary Tumor	1
1.76464	Primary Tumor	1
1.57101	Primary Tumor	1
-4.19751	Primary Tumor	1
-6.36052	Primary Tumor	1
-0.104716	Primary Tumor	1
-4.55117	Primary Tumor	1
1.32055	Primary Tumor	1
-7.07919	Primary Tumor	1
4.30003	Primary Tumor	1
1.31067	Primary Tumor	1
7.36498	Primary Tumor	1
-1.94343	Primary Tumor	1
1.41842	Primary Tumor	1
0.584265	Primary Tumor	1
4.21115	Primary Tumor	1
-0.0204601	Primary Tumor	1
3.41529	Primary Tumor	1
-3.25293	Primary Tumor	1
-4.71005	Primary Tumor	1
-0.470789	Primary Tumor	1
-1.6757	Primary Tumor	1
-3.6566	Primary Tumor	1
7.06667	Primary Tumor	1
-4.14389	Primary Tumor	1
-7.45043	Primary Tumor	1
-1.21837	Primary Tumor	1
3.866	Primary Tumor	1
2.66988	Primary Tumor	1
-5.86639	Primary Tumor	1
-1.87661	Primary Tumor	1
-3.95352	Primary Tumor	1
-6.72091	Primary Tumor	1
-5.67133	Primary Tumor	1
-3.07907	Primary Tumor	1
1.09347	Primary Tumor	1
4.6705	Primary Tumor	1
5.20858	Primary Tumor	1
5.66192	Primary Tumor	1
2.50928	Primary Tumor	1
2.03488	Primary Tumor	1
6.07624	Primary Tumor	1
-0.637684	Primary Tumor	1
-6.0816	Primary Tumor	1
-4.69895	Primary Tumor	1
3.71233	Primary Tumor	1
0.455531	Primary Tumor	1
0.337	Primary Tumor	1
3.37913	Primary Tumor	1
2.47957	Primary Tumor	1
-6.66948	Primary Tumor	1
-4.50034	Primary Tumor	1
0.51546	Primary Tumor	1
6.08785	Primary Tumor	1
-4.01339	Primary Tumor	1
-1.31896	Primary Tumor	1
0.557598	Primary Tumor	1
-2.7467	Primary Tumor	1
-3.06621	Primary Tumor	1
5.83539	Primary Tumor	1
3.06989	Primary Tumor	1
4.23518	Primary Tumor	1
1.69624	Primary Tumor	1
-6.88082	Primary Tumor	1
3.84367	Primary Tumor	1
-4.29175	Primary Tumor	1
4.07654	Primary Tumor	1
-2.42634	Primary Tumor	1
0.911652	Primary Tumor	1
-1.14309	Primary Tumor	1
5.39334	Primary Tumor	1
0.553495	Primary Tumor	1
3.73099	Primary Tumor	1
0.647415	Primary Tumor	1
3.39984	Primary Tumor	1
-5.37171	Primary Tumor	1
0.545763	Primary Tumor	1
5.44089	Primary Tumor	1
5.95688	Primary Tumor	1
4.96064	Primary Tumor	1
-7.04901	Primary Tumor	1
-0.471687	Primary Tumor	1
0.576844	Primary Tumor	1
-2.43907	Primary Tumor	1
-0.441775	Primary Tumor	1
3.84236	Primary Tumor	1
-2.84078	Primary Tumor	1
-4.52496	Primary Tumor	1
2.96513	Primary Tumor	1
2.97164	Primary Tumor	1
0.400529	Primary Tumor	1
2.77083	Primary Tumor	1
-1.41576	Primary Tumor	1
1.92741	Primary Tumor	1
3.58563	Primary Tumor	1
-4.18685	Primary Tumor	1
0.38812	Primary Tumor	1
1.06182	Primary Tumor	1
-1.70682	Primary Tumor	1
-3.118	Primary Tumor	1
3.48396	Primary Tumor	1
3.92348	Primary Tumor	1
-2.99452	Primary Tumor	1
3.02647	Primary Tumor	1
3.02502	Primary Tumor	1
-4.40651	Primary Tumor	1
-4.49342	Primary Tumor	1
-2.44638	Primary Tumor	1
-6.92239	Primary Tumor	1
-5.4196	Primary Tumor	1
5.18617	Primary Tumor	1
-3.71914	Primary Tumor	1
-3.11511	Primary Tumor	1
2.49373	Primary Tumor	1
-6.98525	Primary Tumor	1
2.85973	Primary Tumor	1
3.57256	Primary Tumor	1
-2.21855	Primary Tumor	1
-6.97307	Primary Tumor	1
-3.01247	Primary Tumor	1
-0.72518	Primary Tumor	1
3.61364	Primary Tumor	1
-2.64843	Primary Tumor	1
-2.72833	Primary Tumor	1
-5.17334	Primary Tumor	1
-0.68494	Primary Tumor	1
0.778946	Primary Tumor	1
0.739775	Primary Tumor	1
2.09426	Primary Tumor	1
2.70323	Primary Tumor	1
1.32384	Primary Tumor	1
-4.28736	Primary Tumor	1
-4.13056	Primary Tumor	1
-3.30997	Primary Tumor	1
0.922125	Primary Tumor	1
0.191976	Primary Tumor	1
5.62591	Primary Tumor	1
1.55836	Primary Tumor	1
-0.633186	Primary Tumor	1
5.54284	Primary Tumor	1
-5.42733	Primary Tumor	1
4.19574	Primary Tumor	1
2.32892	Primary Tumor	1
3.54898	Primary Tumor	1
-1.6821	Primary Tumor	1
-7.29243	Primary Tumor	1
0.648998	Primary Tumor	1
2.52498	Primary Tumor	1
1.21559	Primary Tumor	1
2.33268	Primary Tumor	1
4.13673	Primary Tumor	1
1.93952	Primary Tumor	1
2.03275	Primary Tumor	1
-0.34028	Primary Tumor	1
-0.644055	Primary Tumor	1
-3.92837	Primary Tumor	1
-4.93029	Primary Tumor	1
2.16524	Primary Tumor	1
4.39516	Primary Tumor	1
2.4579	Primary Tumor	1
2.72651	Primary Tumor	1
-3.64536	Primary Tumor	1
-3.50226	Primary Tumor	1
4.69442	Primary Tumor	1
-3.85802	Primary Tumor	1
5.01626	Primary Tumor	1
0.207532	Primary Tumor	1
-1.54597	Primary Tumor	1
4.78592	Primary Tumor	1
0.988417	Primary Tumor	1
0.542229	Primary Tumor	1
4.77837	Primary Tumor	1
4.52783	Primary Tumor	1
1.54104	Primary Tumor	1
3.85244	Primary Tumor	1
5.31466	Primary Tumor	1
2.84928	Primary Tumor	1
-2.95247	Primary Tumor	1
-6.35082	Primary Tumor	1
-2.49685	Primary Tumor	1
-3.24752	Primary Tumor	1
-5.21534	Primary Tumor	1
-4.29947	Primary Tumor	1
3.09316	Primary Tumor	1
3.16624	Primary Tumor	1
4.48615	Primary Tumor	1
1.43808	Primary Tumor	1
-6.77652	Primary Tumor	1
-4.8453	Primary Tumor	1
5.3438	Primary Tumor	1
2.84613	Primary Tumor	1
-2.14445	Primary Tumor	1
-0.947384	Primary Tumor	1
2.29893	Primary Tumor	1
-3.04246	Primary Tumor	1
5.96056	Primary Tumor	1
-3.55449	Primary Tumor	1
0.382246	Primary Tumor	1
-0.823837	Primary Tumor	1
3.70032	Primary Tumor	1
-6.1617	Primary Tumor	1
-2.33125	Primary Tumor	1
3.12847	Primary Tumor	1
-5.28907	Primary Tumor	1
-1.98282	Primary Tumor	1
0.463935	Primary Tumor	1
1.47304	Primary Tumor	1
0.533476	Primary Tumor	1
-0.656473	Primary Tumor	1
-3.568	Primary Tumor	1
4.75635	Primary Tumor	1
0.336531	Primary Tumor	1
2.77241	Primary Tumor	1
-6.60606	Primary Tumor	1
1.79188	Primary Tumor	1
5.66976	Primary Tumor	1
2.22455	Primary Tumor	1
4.26869	Primary Tumor	1
3.43885	Primary Tumor	1
-5.8503	Primary Tumor	1
-1.99184	Primary Tumor	1
-6.22939	Primary Tumor	1
7.51985	Primary Tumor	1
2.24627	Primary Tumor	1
5.89667	Primary Tumor	1
3.92249	Primary Tumor	1
5.02954	Primary Tumor	1
1.83499	Primary Tumor	1
-5.48167	Primary Tumor	1
-3.13211	Primary Tumor	1
-3.65156	Primary Tumor	1
-0.528674	Primary Tumor	1
3.05944	Primary Tumor	1
-2.23712	Primary Tumor	1
3.91133	Primary Tumor	1
-2.02981	Primary Tumor	1
5.86069	Primary Tumor	1
0.73345	Primary Tumor	1
0.652604	Primary Tumor	1
0.31016	Primary Tumor	1
-2.98159	Primary Tumor	1
0.915505	Primary Tumor	1
-4.64093	Primary Tumor	1
-2.18675	Primary Tumor	1
4.27311	Primary Tumor	1
4.97732	Primary Tumor	1
-7.10997	Primary Tumor	1
1.63152	Primary Tumor	1
1.25224	Primary Tumor	1
1.70064	Primary Tumor	1
2.129	Primary Tumor	1
2.12639	Primary Tumor	1
2.53605	Primary Tumor	1
1.34414	Primary Tumor	1
-7.15771	Primary Tumor	1
3.99109	Primary Tumor	1
0.3772	Primary Tumor	1
-1.05456	Primary Tumor	1
5.1211	Primary Tumor	1
7.37728	Primary Tumor	1
5.87629	Primary Tumor	1
-3.37637	Primary Tumor	1
-0.810965	Primary Tumor	1
1.05708	Primary Tumor	1
1.80182	Primary Tumor	1
-0.818356	Primary Tumor	1
-7.42724	Primary Tumor	1
-5.58033	Primary Tumor	1
1.64047	Primary Tumor	1
4.39894	Primary Tumor	1
0.718557	Primary Tumor	1
4.86358	Primary Tumor	1
-6.9528	Primary Tumor	1
-2.38624	Primary Tumor	1
-4.77559	Primary Tumor	1
4.18145	Primary Tumor	1
-1.387	Primary Tumor	1
3.79039	Primary Tumor	1
-5.7297	Primary Tumor	1
-4.29725	Primary Tumor	1
-1.89643	Primary Tumor	1
-5.02415	Primary Tumor	1
4.78942	Primary Tumor	1
4.07633	Primary Tumor	1
6.22315	Primary Tumor	1
4.34303	Primary Tumor	1
2.37765	Primary Tumor	1
0.726589	Primary Tumor	1
4.42549	Primary Tumor	1
3.21314	Primary Tumor	1
2.04702	Primary Tumor	1
4.82937	Primary Tumor	1
4.39337	Primary Tumor	1
-0.596384	Primary Tumor	1
1.06398	Primary Tumor	1
-0.45278	Primary Tumor	1
1.55742	Primary Tumor	1
-1.73069	Primary Tumor	1
-3.77972	Primary Tumor	1
2.81269	Primary Tumor	1
1.05006	Primary Tumor	1
3.98403	Primary Tumor	1
2.80425	Primary Tumor	1
-0.870954	Primary Tumor	1
-3.66768	Primary Tumor	1
2.65657	Primary Tumor	1
5.25723	Primary Tumor	1
-0.0364639	Primary Tumor	1
-1.67488	Primary Tumor	1
-6.96644	Primary Tumor	1
1.76662	Primary Tumor	1
-2.95564	Primary Tumor	1
-0.41339	Primary Tumor	1
3.62896	Primary Tumor	1
5.29538	Primary Tumor	1
-3.51975	Primary Tumor	1
3.80768	Primary Tumor	1
-5.5654	Primary Tumor	1
0.375746	Primary Tumor	1
-5.13219	Primary Tumor	1
-1.85748	Primary Tumor	1
-3.24969	Primary Tumor	1
2.94619	Primary Tumor	1
-3.77693	Primary Tumor	1
-0.807778	Primary Tumor	1
4.1006	Primary Tumor	1
5.81772	Primary Tumor	1
0.313765	Primary Tumor	1
2.17478	Primary Tumor	1
-2.23251	Primary Tumor	1
3.89402	Primary Tumor	1
-2.87589	Primary Tumor	1
-4.60639	Primary Tumor	1
-6.12769	Primary Tumor	1
6.28528	Primary Tumor	1
-0.374155	Primary Tumor	1
-0.844386	Primary Tumor	1
5.95316	Primary Tumor	1
-4.66365	Primary Tumor	1
0.608191	Primary Tumor	1
6.09337	Primary Tumor	1
-4.63001	Primary Tumor	1
-0.376398	Primary Tumor	1
0.876797	Primary Tumor	1
4.19292	Primary Tumor	1
0.284263	Primary Tumor	1
4.61507	Primary Tumor	1
2.43677	Primary Tumor	1
-3.90823	Primary Tumor	1
5.33181	Primary Tumor	1
4.71965	Primary Tumor	1
3.3662	Primary Tumor	1
4.39078	Solid Tissue Normal	0
3.97832	Solid Tissue Normal	0
5.48593	Solid Tissue Normal	0
5.46113	Solid Tissue Normal	0
5.3169	Solid Tissue Normal	0
5.64609	Solid Tissue Normal	0
5.69786	Solid Tissue Normal	0
4.60645	Solid Tissue Normal	0
4.65816	Solid Tissue Normal	0
4.56182	Solid Tissue Normal	0
5.43772	Solid Tissue Normal	0
3.8891	Solid Tissue Normal	0
3.42354	Solid Tissue Normal	0
4.28728	Solid Tissue Normal	0
4.6655	Solid Tissue Normal	0
4.39831	Solid Tissue Normal	0
4.81353	Solid Tissue Normal	0
4.87408	Solid Tissue Normal	0
3.47884	Solid Tissue Normal	0
2.59882	Solid Tissue Normal	0
3.8819	Solid Tissue Normal	0
4.54496	Solid Tissue Normal	0
5.84655	Solid Tissue Normal	0
-1.23706	Solid Tissue Normal	0
4.84374	Solid Tissue Normal	0
5.94404	Solid Tissue Normal	0
4.61558	Solid Tissue Normal	0
5.00016	Solid Tissue Normal	0
5.11325	Solid Tissue Normal	0
4.31145	Solid Tissue Normal	0
3.10108	Solid Tissue Normal	0
5.54098	Solid Tissue Normal	0
5.26798	Solid Tissue Normal	0
5.28447	Solid Tissue Normal	0
2.26598	Solid Tissue Normal	0
3.85321	Solid Tissue Normal	0
4.27174	Solid Tissue Normal	0
5.56881	Solid Tissue Normal	0
4.13875	Solid Tissue Normal	0
3.48852	Solid Tissue Normal	0
4.24973	Solid Tissue Normal	0
5.03826	Solid Tissue Normal	0
5.02538	Solid Tissue Normal	0
2.80041	Solid Tissue Normal	0
5.14338	Solid Tissue Normal	0
5.23409	Solid Tissue Normal	0
4.03971	Solid Tissue Normal	0
4.25032	Solid Tissue Normal	0
3.5216	Solid Tissue Normal	0
3.45948	Solid Tissue Normal	0
