# Supplementary material for: LINC00844 promotes proliferation and migration of hepatocellular carcinoma by regulating NDRG1 expression
Source: PeerJ. 2020 Jan 28;8:e8394. doi: 10.7717/peerj.8394 (PMC6993750; doi:10.7717/peerj.8394)
Supplement: File S5 [file peerj-08-8394-s007.xls]

## Sheet: Sheet1
L02	SK-HEP-1	SMMC-7721	HCCLM9	Hep G2
1.12989	0.571633	0.585808	0.489465	0.167333
0.933636	0.593166	0.597234	0.533779	0.126815
0.947953	0.639837	0.662962	0.560304	0.245505
