# Supplementary material for: LINC00844 promotes proliferation and migration of hepatocellular carcinoma by regulating NDRG1 expression
Source: PeerJ. 2020 Jan 28;8:e8394. doi: 10.7717/peerj.8394 (PMC6993750; doi:10.7717/peerj.8394)
Supplement: File S6 [file peerj-08-8394-s008.xls]

## Sheet: Sheet1
	Lv-NC			Lv-LINC00844
HepG2	0.824622	1.18903	1.01989	1567.82	1459.02	1530.65
HCCLM9	0.850434	1.29233	0.909885	989.508	1075.38	1006.05
