# Supplementary material for: LINC00844 promotes proliferation and migration of hepatocellular carcinoma by regulating NDRG1 expression
Source: PeerJ. 2020 Jan 28;8:e8394. doi: 10.7717/peerj.8394 (PMC6993750; doi:10.7717/peerj.8394)
Supplement: File S8 [file peerj-08-8394-s010.xls]

## Sheet: Sheet1
	HepG2
TIME	Lv-NC			Lv-LINC00844
0h	0.228	0.222	0.243	0.29	0.294	0.211
24h	0.335	0.334	0.312	0.259	0.28	0.268
48h	0.834	0.736	0.689	0.532	0.414	0.487
72h	1.344	1.62	1.476	0.889	0.944	1.059
	HCCLM9
TIME	Lv-NC			Lv-LINC00844
0	0.289	0.246	0.262	0.254	0.244	0.238
24	0.453	0.451	0.461	0.36	0.365	0.344
48	0.842	0.965	0.857	0.522	0.598	0.532
72	1.344	1.62	1.476	0.889	0.944	1.059
