# Supplementary material for: LINC00844 promotes proliferation and migration of hepatocellular carcinoma by regulating NDRG1 expression
Source: PeerJ journal article supplement (doi:10.7717/peerj.8394), 2020-01-28
Supplement: supplementary_files_13..pdf [file supplementary_files_13..pdf]

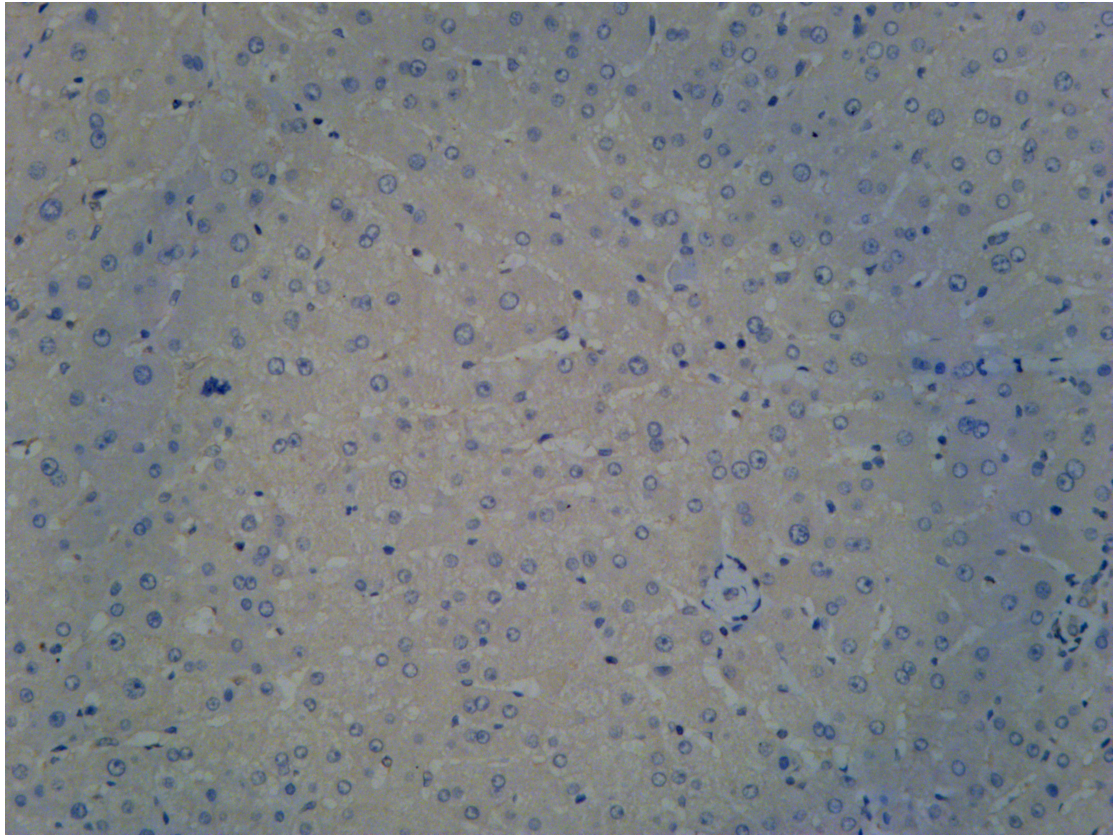

#1 Normal

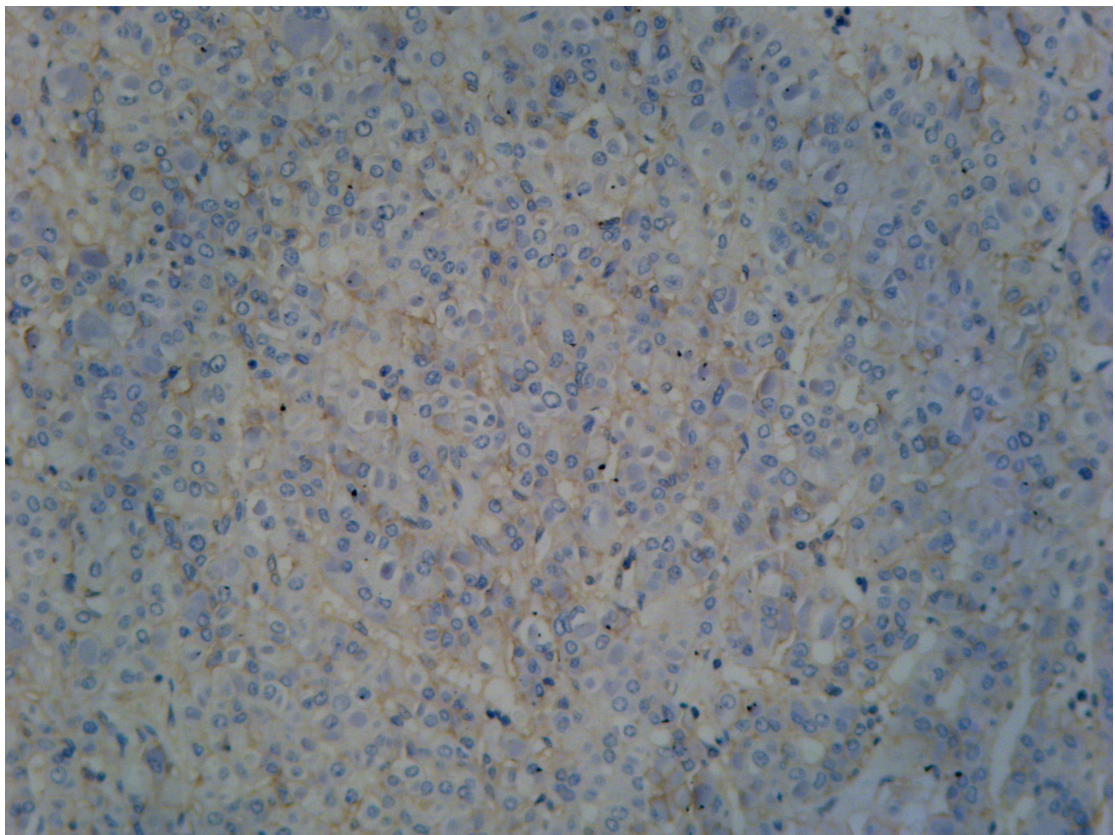

#1 Tumor



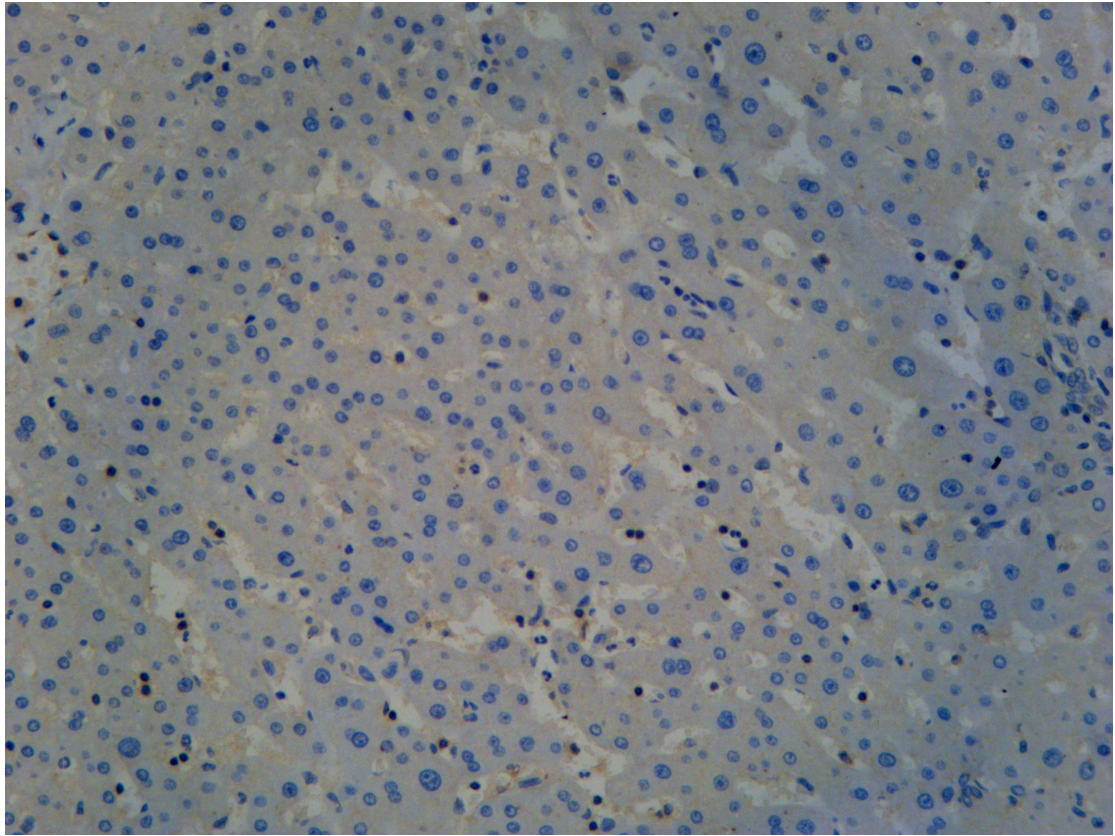

#2 Normal

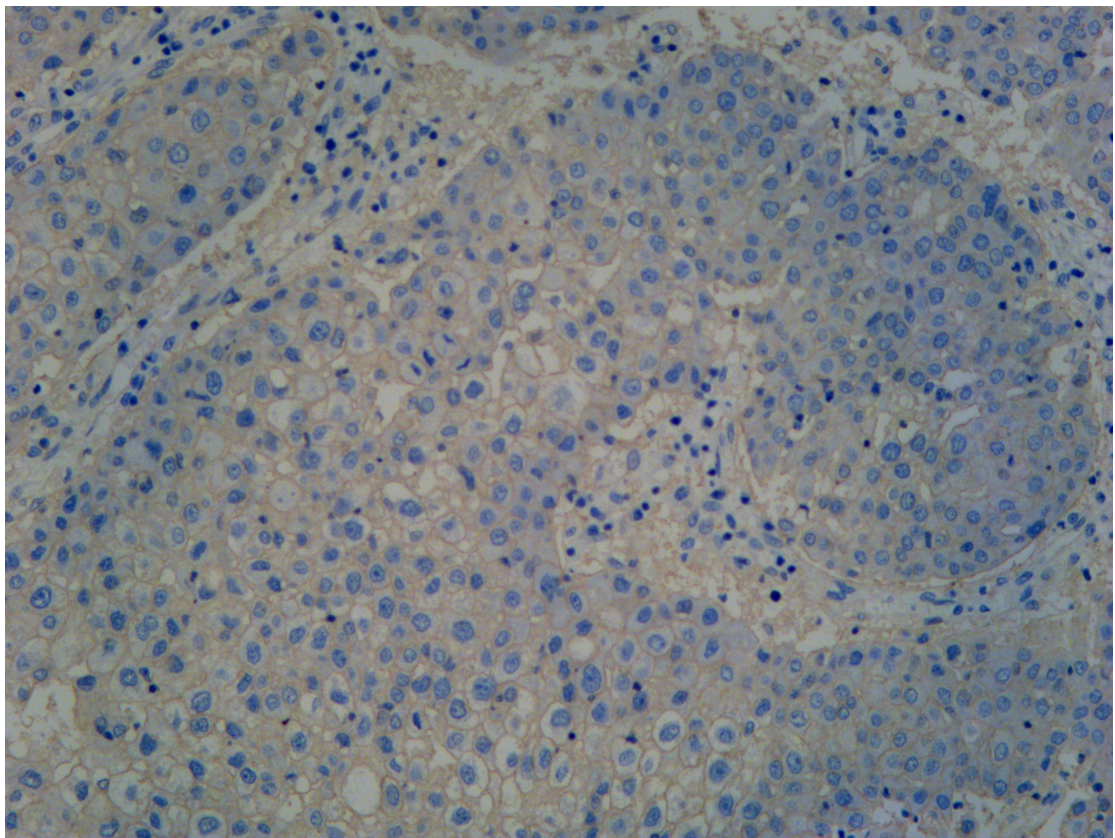

#2 Tumor



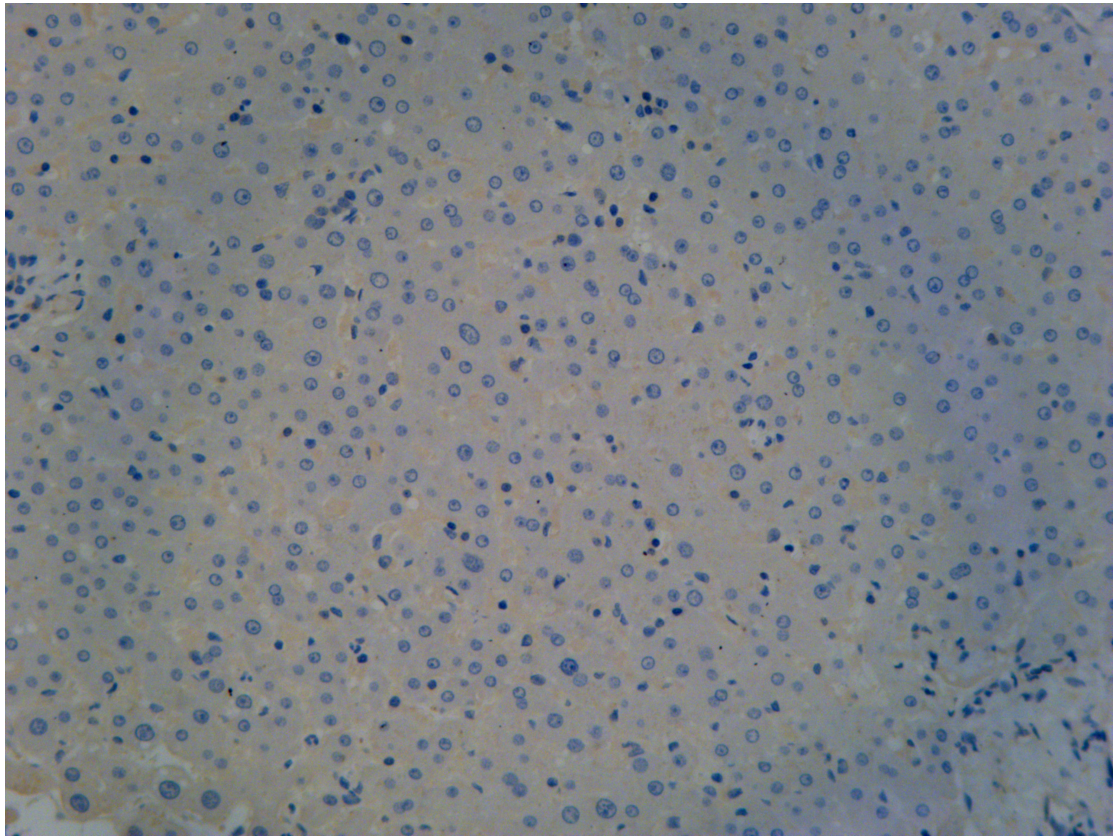

#3 Normal

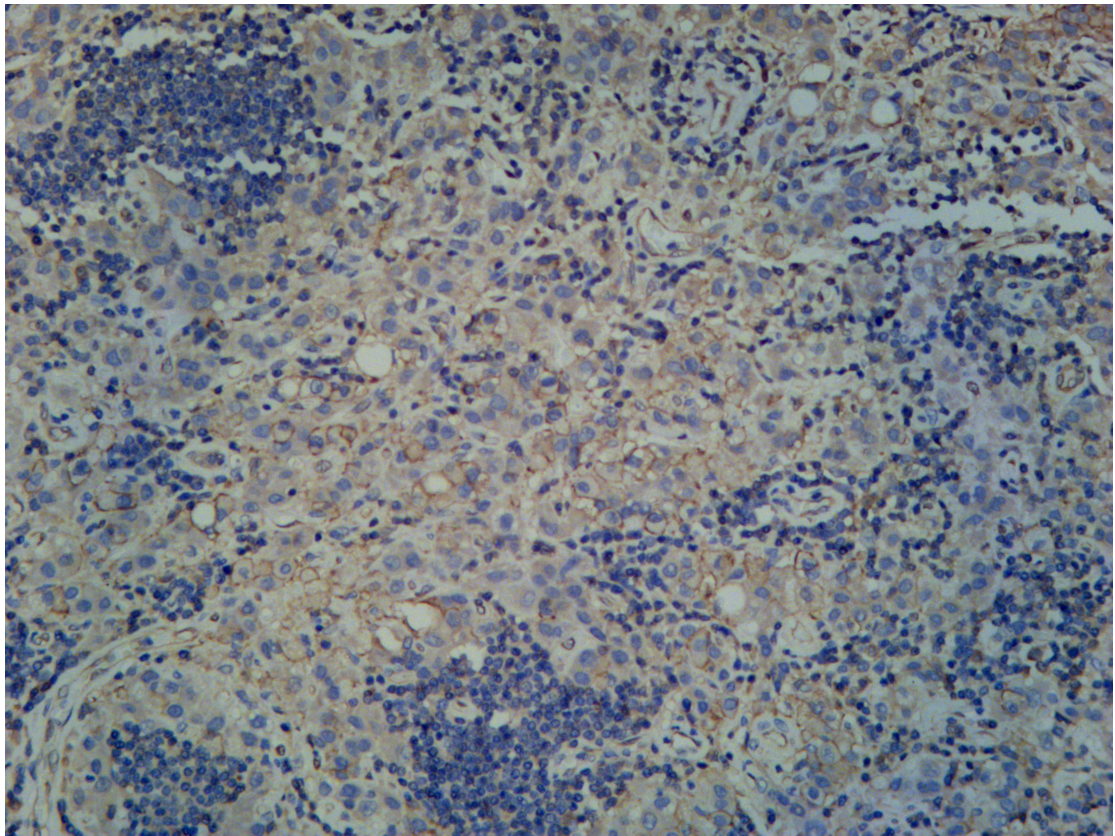

#3 Tumor
