# Supplementary material for: LINC00844 promotes proliferation and migration of hepatocellular carcinoma by regulating NDRG1 expression
Source: PeerJ journal article supplement (doi:10.7717/peerj.8394), 2020-01-28
Supplement: supplementary_files_15.pdf [file supplementary_files_15.pdf]

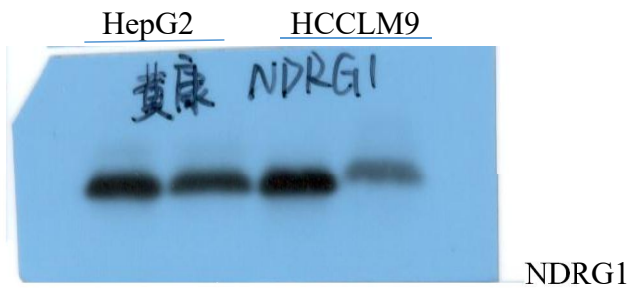

LV-NC  
LV-LINC00844

LV-NC  
LV-LINC00844

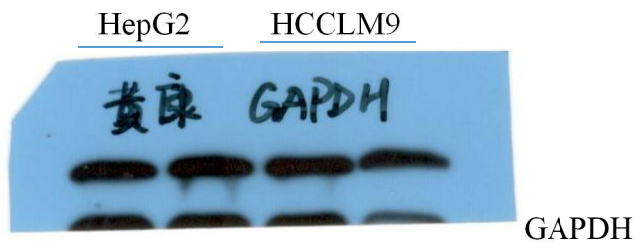

LV-NC  
LV-LINC00844

LV-NC  
LV-LINC00844
